# Supplementary material for: QTL Mapping for Leaf Area of Tea Plants (Camellia sinensis) Based on a High-Quality Genetic Map Constructed by Whole Genome Resequencing
Source: Front Plant Sci. 2021 Jul 29;12:705285. doi: 10.3389/fpls.2021.705285 (PMC8358608; doi:10.3389/fpls.2021.705285)
Supplement: Supplementary Table 2 — Average leaf area information for each offspring. [file Table_2.XLS]

## Sheet: Sheet1
Table S2. Average leaf area information for each offspring
Sample code	Average leaf area	Sample code	Average leaf area
R01	38.595	R22	33.893
R02	43.597	R23	44.972
R03	46.765	R24	40.22
R04	44.344	R25	42.604
R05	36.899	R27	54.045
R08	35.139	R28	34.257
R09	55.941	R29	36.562
R10	50.495	R32	43.469
R101	26.873	R33	50.645
R102	35.632	R34	43.164
R104	53.447	R35	49.539
R105	62.755	R37	39.005
R106	31.186	R38	39.568
R107	28.131	R39	27.89
R108	42.119	R40	18.533
R109	27.368	R42	35.805
R11	41.505	R43	32.838
R110	48.172	R44	29.468
R113	34.318	R45	53.064
R115	47.661	R48	45.396
R120	48.577	R49	40.646
R121	66.861	R50	53.039
R124	40.217	R51	32.957
R125	38.802	R53	46.762
R126	47.426	R54	19.824
R127	35.91	R55	31.047
R128	38.94	R56	35.603
R129	28.776	R58	47.298
R13	45.259	R61	32.363
R130	43.573	R65	42.797
R131	26.34	R67	30.28
R132	35.456	R68	31.873
R133	36.733	R69	32.722
R134	48.057	R71	41.449
R135	44.861	R73	null
R136	22.959	R75	51.246
R137	30.769	R76	28.972
R138	27.797	R77	44.186
R140	30.609	R79	49.027
R141	27.536	R81	55.939
R142	36.959	R83	46.887
R143	30.479	R84	32.391
R16	56.537	R89	35.625
R17	26.543	R92	37.009
R18	47.194	R96	31.775
R19	41.822	R97	39.072
R20	47.07	R98	43.82
R21	42.777	R99	45.914
