# Supplementary material for: QTL Mapping for Leaf Area of Tea Plants (Camellia sinensis) Based on a High-Quality Genetic Map Constructed by Whole Genome Resequencing
Source: Front Plant Sci. 2021 Jul 29;12:705285. doi: 10.3389/fpls.2021.705285 (PMC8358608; doi:10.3389/fpls.2021.705285)
Supplement: Supplementary Table 3 — Annotation information of genes within 90 kb of both sides of the 25 representative markers (potential QTL). [file Table_3.XLS]

## Sheet: Sheet1
Table S3. Annotation information of genes within 90 kb of both sides of the 25 representative markers (potential QTL)
CSS0000342.1	Biological Process: carbohydrate metabolic process (GO:0005975);; Cellular Component: anchored component of membrane (GO:0031225);; Molecular Function: glucan endo-1,3-beta-D-glucosidase activity (GO:0042973);; Molecular Function: cation binding (GO:0043169);;	--	--	Glycosyl hydrolases family 17	Putative uncharacterized protein {ECO:0000313|EMBL:CBI27737.3} OS=Vitis vinifera (Grape) PE=3 SV=1	PREDICTED: glucan endo-1,3-beta-glucosidase 5-like [Nelumbo nucifera]
CSS0001030.1	--	--	Inorganic ion transport and metabolism	Tesmin/TSO1-like CXC domain, cysteine-rich domain	Tesmin/TSO1-like CXC domain-containing protein {ECO:0000313|EMBL:EOY30746.1} OS=Theobroma cacao (Cacao) PE=4 SV=1	Tesmin/TSO1-like CXC domain-containing protein [Theobroma cacao]
CSS0001642.1	Molecular Function: hydrolase activity (GO:0016787);;	K06130|1.1662e-63|sind:105157540|K06130 lysophospholipase II [EC:3.1.1.5] | (RefSeq) acyl-protein thioesterase 1 homolog 1	Lipid transport and metabolism	Phospholipase/Carboxylesterase	Uncharacterized protein {ECO:0000313|EnsemblPlants:Solyc06g067950.2.1} OS=Solanum lycopersicum (Tomato) PE=4 SV=1	PREDICTED: acyl-protein thioesterase 1 homolog 1 [Sesamum indicum]
CSS0002519.1	--	--	--	Protein of unknown function (DUF4005)	Uncharacterized protein {ECO:0000313|EMBL:EEE85303.2} OS=Populus trichocarpa (Western balsam poplar) PE=4 SV=2	PREDICTED: protein IQ-DOMAIN 1 [Nelumbo nucifera]
CSS0002551.1	Biological Process: cellular process (GO:0009987);;	--	--	WRC	Putative uncharacterized protein {ECO:0000313|EMBL:EEF43454.1} OS=Ricinus communis (Castor bean) PE=4 SV=1	PREDICTED: growth-regulating factor 8 [Vitis vinifera]
CSS0002644.1	Biological Process: cellular process (GO:0009987);;	K00784|0|vvi:100254820|K00784 ribonuclease Z [EC:3.1.26.11] | (RefSeq) zinc phosphodiesterase ELAC protein 2	General function prediction only	Beta-lactamase superfamily domain	Putative uncharacterized protein {ECO:0000313|EMBL:CCB59451.1} OS=Vitis vinifera (Grape) PE=3 SV=1	PREDICTED: zinc phosphodiesterase ELAC protein 2 [Vitis vinifera]
CSS0003283.1	Biological Process: transport (GO:0006810);; Cellular Component: integral component of membrane (GO:0016021);; Cellular Component: cytoplasmic vesicle (GO:0016023);;	K20347|2.44729e-59|vvi:104877624|K20347 p24 family protein beta-1 | (RefSeq) transmembrane emp24 domain-containing protein p24beta2	Intracellular trafficking, secretion, and vesicular transport	emp24/gp25L/p24 family/GOLD	Putative uncharacterized protein {ECO:0000313|EMBL:CBI39754.3} OS=Vitis vinifera (Grape) PE=3 SV=1	PREDICTED: transmembrane emp24 domain-containing protein p24beta2-like [Vitis vinifera]
CSS0004196.1	Cellular Component: membrane (GO:0016020);; Molecular Function: hydrolase activity, acting on glycosyl bonds (GO:0016798);;	K07964|0|nnu:104598612|K07964 heparanase [EC:3.2.1.166] | (RefSeq) heparanase-like protein 1	--	Glycosyl hydrolase family 79, N-terminal domain	Glucuronidase 2 isoform 1 {ECO:0000313|EMBL:EOY21989.1} OS=Theobroma cacao (Cacao) PE=4 SV=1	PREDICTED: heparanase-like protein 1 [Nelumbo nucifera]
CSS0004380.1	--	K11498|2.34224e-24|vvi:100854194|K11498 centromeric protein E | (RefSeq) kinesin-like protein KIN-7F	Cytoskeleton	Domain of unknown function (DUF3490)	Kinesin-like protein {ECO:0000256|RuleBase:RU000394} OS=Vitis vinifera (Grape) PE=3 SV=1	PREDICTED: kinesin-like protein NACK1 [Vitis vinifera]
CSS0004941.3	Molecular Function: starch synthase activity (GO:0009011);; Biological Process: glucan biosynthetic process (GO:0009250);;	K13679|0|tcc:TCM_015612|K13679 granule-bound starch synthase [EC:2.4.1.242] | (RefSeq) UDP-Glycosyltransferase superfamily protein isoform 1	--	Starch synthase catalytic domain	Starch synthase, chloroplastic/amyloplastic {ECO:0000256|RuleBase:RU361232} OS=Theobroma cacao (Cacao) PE=3 SV=1	UDP-Glycosyltransferase superfamily protein isoform 1 [Theobroma cacao]
CSS0005668.1	--	K11975|5.91865e-123|vvi:100252570|K11975 E3 ubiquitin-protein ligase RNF144 [EC:2.3.2.27] | (RefSeq) probable E3 ubiquitin-protein ligase RNF144A-B	Posttranslational modification, protein turnover, chaperones	IBR domain	Coffea canephora DH200=94 genomic scaffold, scaffold_9 {ECO:0000313|EMBL:CDP03027.1} OS=Coffea canephora (Robusta coffee) PE=4 SV=1	unnamed protein product [Coffea canephora]
CSS0006199.1	--	--	General function prediction only	C2H2-type zinc finger	C2H2-like zinc finger protein, putative {ECO:0000313|EMBL:EOY22000.1} OS=Theobroma cacao (Cacao) PE=4 SV=1	C2H2-like zinc finger protein, putative [Theobroma cacao]
CSS0006920.1	Molecular Function: transporter activity (GO:0005215);; Biological Process: cellular process (GO:0009987);; Molecular Function: transferase activity, transferring phosphorus-containing groups (GO:0016772);; Molecular Function: ion binding (GO:0043167);; Biological Process: macromolecule metabolic process (GO:0043170);; Biological Process: primary metabolic process (GO:0044238);; Biological Proces…	--	General function prediction only	Reverse transcriptase (RNA-dependent DNA polymerase)	Putative uncharacterized protein {ECO:0000313|EMBL:CAN69037.1} OS=Vitis vinifera (Grape) PE=4 SV=1	hypothetical protein VITISV_026270 [Vitis vinifera]
CSS0007000.1	--	--	--	--	Putative uncharacterized protein {ECO:0000313|EMBL:CCB43059.1} OS=Vitis vinifera (Grape) PE=4 SV=1	PREDICTED: uncharacterized protein LOC100263964 [Vitis vinifera]
CSS0007186.1	Cellular Component: intracellular part (GO:0044424);; Biological Process: cellular process (GO:0044763);; Biological Process: regulation of cellular process (GO:0050794);;	K13462|1.93267e-72|vvi:100249070|K13462 guanine nucleotide-exchange factor | (RefSeq) brefeldin A-inhibited guanine nucleotide-exchange protein 5	Intracellular trafficking, secretion, and vesicular transport	--	Putative uncharacterized protein {ECO:0000313|EMBL:CAN66773.1} OS=Vitis vinifera (Grape) PE=4 SV=1	hypothetical protein VITISV_006775 [Vitis vinifera]
CSS0008812.1	--	--	General function prediction only	Leucine rich repeat	Uncharacterized protein {ECO:0000313|EMBL:EYU29006.1} OS=Erythranthe guttata (Yellow monkey flower) PE=4 SV=1	hypothetical protein MIMGU_mgv1a018225mg [Erythranthe guttata]
CSS0009651.1	--	--	--	--	Uncharacterized protein {ECO:0000313|EMBL:ESR40148.1} OS=Citrus clementina PE=4 SV=1	PREDICTED: uncharacterized protein LOC102627484 isoform X2 [Citrus sinensis]
CSS0009904.1	Molecular Function: transferase activity (GO:0016740);;	--	--	Transferase family	Coffea canephora DH200=94 genomic scaffold, scaffold_44 {ECO:0000313|EMBL:CDP10330.1} OS=Coffea canephora (Robusta coffee) PE=4 SV=1	unnamed protein product [Coffea canephora]
CSS0010045.1	Biological Process: metabolic process (GO:0008152);; Molecular Function: kaempferol 3-O-galactosyltransferase activity (GO:0033834);;	--	--	UDP-glucoronosyl and UDP-glucosyl transferase	Flavonoid 3-0-galactosyltransferase {ECO:0000313|EMBL:ADC34700.1} OS=Actinidia chinensis (Kiwi) PE=2 SV=1	flavonoid 3-0-galactosyltransferase [Actinidia chinensis]
CSS0010075.1	Cellular Component: cis-Golgi network (GO:0005801);; Cellular Component: cytosol (GO:0005829);; Biological Process: intracellular protein transport (GO:0006886);; Cellular Component: membrane (GO:0016020);;	K20290|2.60565e-119|vvi:100247522|K20290 conserved oligomeric Golgi complex subunit 3 | (RefSeq) conserved oligomeric Golgi complex subunit 3	Intracellular trafficking, secretion, and vesicular transport	--	Uncharacterized protein {ECO:0000313|EMBL:KCW79345.1} OS=Eucalyptus grandis (Flooded gum) PE=4 SV=1	hypothetical protein EUGRSUZ_C00763 [Eucalyptus grandis]
CSS0010879.1	Biological Process: metabolic process (GO:0008152);; Molecular Function: hydrolase activity, acting on ester bonds (GO:0016788);;	--	--	Pectinesterase	Pectinesterase {ECO:0000256|RuleBase:RU000589} OS=Erythranthe guttata (Yellow monkey flower) PE=3 SV=1	hypothetical protein MIMGU_mgv1a003232mg [Erythranthe guttata]
CSS0011072.1	Molecular Function: catalytic activity (GO:0003824);; Biological Process: metabolic process (GO:0008152);;	--	RNA processing and modification	--	Uncharacterized protein {ECO:0000313|EMBL:EMJ16395.1} OS=Prunus persica (Peach) PE=4 SV=1	PREDICTED: LYR motif-containing protein 4 [Nelumbo nucifera]
CSS0011322.1	Molecular Function: phosphatidylinositol phosphate kinase activity (GO:0016307);; Biological Process: phosphorylation (GO:0016310);; Molecular Function: ion binding (GO:0043167);; Biological Process: phosphatidylinositol metabolic process (GO:0046488);;	K00921|0|nnu:104609260|K00921 1-phosphatidylinositol-3-phosphate 5-kinase [EC:2.7.1.150] | (RefSeq) 1-phosphatidylinositol-3-phosphate 5-kinase FAB1B	Signal transduction mechanisms	Phosphatidylinositol-4-phosphate 5-Kinase	Phosphatidylinositol-4-phosphate 5-kinase family protein, putative isoform 1 {ECO:0000313|EMBL:EOY30134.1} OS=Theobroma cacao (Cacao) PE=4 SV=1	PREDICTED: 1-phosphatidylinositol-3-phosphate 5-kinase FAB1B [Nelumbo nucifera]
CSS0011674.1	--	--	General function prediction only	--	Putative uncharacterized protein {ECO:0000313|EMBL:EEF31692.1} OS=Ricinus communis (Castor bean) PE=4 SV=1	PREDICTED: uncharacterized protein LOC101309247 [Fragaria vesca subsp. vesca]
CSS0012684.1	--	K11498|1.71597e-51|vvi:100854194|K11498 centromeric protein E | (RefSeq) kinesin-like protein KIN-7F	Cytoskeleton	--	Kinesin-like protein {ECO:0000256|RuleBase:RU000394} OS=Vitis vinifera (Grape) PE=3 SV=1	PREDICTED: kinesin-like protein NACK1 [Vitis vinifera]
CSS0012713.1	Molecular Function: binding (GO:0005488);;	--	General function prediction only	Reverse transcriptase (RNA-dependent DNA polymerase)	Putative uncharacterized protein {ECO:0000313|EMBL:CAN71445.1} OS=Vitis vinifera (Grape) PE=4 SV=1	hypothetical protein VITISV_042489 [Vitis vinifera]
CSS0013181.1	--	--	--	B3 DNA binding domain	Putative uncharacterized protein {ECO:0000313|EMBL:CBI14875.3} OS=Vitis vinifera (Grape) PE=4 SV=1	PREDICTED: uncharacterized protein LOC104882266 isoform X1 [Vitis vinifera]
CSS0013487.1	Molecular Function: DNA binding (GO:0003677);; Molecular Function: ATP-dependent DNA helicase activity (GO:0004003);; Molecular Function: ATP binding (GO:0005524);; Cellular Component: nucleus (GO:0005634);; Biological Process: nucleobase-containing compound metabolic process (GO:0006139);;	K11136|3.67744e-51|pop:POPTR_0001s18050g|K11136 regulator of telomere elongation helicase 1 [EC:3.6.4.12] | (RefSeq) POPTRDRAFT_846802; helicase-related family protein	Replication, recombination and repair	--	Helicase-related family protein {ECO:0000313|EMBL:EEE82948.2} OS=Populus trichocarpa (Western balsam poplar) PE=4 SV=2	PREDICTED: regulator of telomere elongation helicase 1 isoform X5 [Populus euphratica]
CSS0013985.1	--	--	Transcription	SRF-type transcription factor (DNA-binding and dimerisation domain)	Coffea canephora DH200=94 genomic scaffold, scaffold_12 {ECO:0000313|EMBL:CDP04205.1} OS=Coffea canephora (Robusta coffee) PE=4 SV=1	unnamed protein product [Coffea canephora]
CSS0014883.1	Biological Process: metabolic process (GO:0008152);; Molecular Function: hydrolase activity, acting on ester bonds (GO:0016788);;	K01051|0|tcc:TCM_037448|K01051 pectinesterase [EC:3.1.1.11] | (RefSeq) Plant invertase/pectin methylesterase inhibitor superfamily	--	Pectinesterase	Pectinesterase {ECO:0000256|RuleBase:RU000589} OS=Theobroma cacao (Cacao) PE=3 SV=1	Plant invertase/pectin methylesterase inhibitor superfamily [Theobroma cacao]
CSS0015765.1	Molecular Function: hydrolase activity, hydrolyzing O-glycosyl compounds (GO:0004553);; Biological Process: organic substance metabolic process (GO:0071704);;	K01183|0|vvi:100248333|K01183 chitinase [EC:3.2.1.14] | (RefSeq) acidic mammalian chitinase	Carbohydrate transport and metabolism	Glycosyl hydrolases family 18	Putative uncharacterized protein {ECO:0000313|EMBL:CBI25623.3} OS=Vitis vinifera (Grape) PE=3 SV=1	PREDICTED: acidic mammalian chitinase-like [Vitis vinifera]
CSS0016412.1	Cellular Component: cis-Golgi network (GO:0005801);; Cellular Component: cytosol (GO:0005829);; Biological Process: intracellular protein transport (GO:0006886);; Cellular Component: membrane (GO:0016020);;	K20290|1.78212e-13|tcc:TCM_037450|K20290 conserved oligomeric Golgi complex subunit 3 | (RefSeq) Sec34-like family protein isoform 1	--	--	Sec34-like family protein isoform 2 {ECO:0000313|EMBL:EOY30131.1} OS=Theobroma cacao (Cacao) PE=4 SV=1	Sec34-like family protein isoform 2 [Theobroma cacao]
CSS0016947.1	Cellular Component: integral component of plasma membrane (GO:0005887);; Biological Process: embryo sac development (GO:0009553);; Biological Process: pollen development (GO:0009555);; Biological Process: embryo development (GO:0009790);; Molecular Function: identical protein binding (GO:0042802);;	--	--	--	Putative uncharacterized protein {ECO:0000313|EMBL:CBI28388.3} OS=Vitis vinifera (Grape) PE=4 SV=1	PREDICTED: protein GAMETE EXPRESSED 1 [Vitis vinifera]
CSS0017362.1	Molecular Function: binding (GO:0005488);;	--	--	Domain of unknown function (DUF4371)	Uncharacterized protein {ECO:0000313|EMBL:ESR44381.1} OS=Citrus clementina PE=4 SV=1	PREDICTED: zinc finger MYM-type protein 1-like [Citrus sinensis]
CSS0017440.1	--	K17824|7.63407e-06|mus:103969099|K17824 DCN1-like protein 4/5 | (RefSeq) DCN1-like protein 4	--	--	Uncharacterized protein {ECO:0000313|EnsemblPlants:GRMZM2G076951_P01} OS=Zea mays (Maize) PE=4 SV=1	hypothetical protein ZEAMMB73_411585 [Zea mays]
CSS0018166.1	--	--	--	Transcriptional repressor, ovate	Ovate family protein 14, putative {ECO:0000313|EMBL:EOY26740.1} OS=Theobroma cacao (Cacao) PE=4 SV=1	Ovate family protein 14, putative [Theobroma cacao]
CSS0018458.1	Cellular Component: vacuole (GO:0005773);;	--	Lipid transport and metabolism	START domain	Putative uncharacterized protein {ECO:0000313|EMBL:CCB58311.1} OS=Vitis vinifera (Grape) PE=4 SV=1	PREDICTED: uncharacterized protein LOC100247984 [Vitis vinifera]
CSS0018915.1	--	--	Inorganic ion transport and metabolism	Sodium/hydrogen exchanger family	Coffea canephora DH200=94 genomic scaffold, scaffold_164 {ECO:0000313|EMBL:CDP17496.1} OS=Coffea canephora (Robusta coffee) PE=4 SV=1	PREDICTED: cation/H(+) antiporter 3-like [Vitis vinifera]
CSS0019263.1	--	--	General function prediction only	--	Retrotransposon protein, putative {ECO:0000313|EMBL:EOY03078.1} OS=Theobroma cacao (Cacao) PE=4 SV=1	Retrotransposon protein, putative [Theobroma cacao]
CSS0019629.1	--	--	Transcription	SRF-type transcription factor (DNA-binding and dimerisation domain)	Coffea canephora DH200=94 genomic scaffold, scaffold_12 {ECO:0000313|EMBL:CDP04205.1} OS=Coffea canephora (Robusta coffee) PE=4 SV=1	unnamed protein product [Coffea canephora]
CSS0021753.1	Biological Process: cellular amino acid metabolic process (GO:0006520);; Biological Process: oxidation-reduction process (GO:0055114);;	--	Amino acid transport and metabolism	Homoserine dehydrogenase	Homoserine dehydrogenase family protein {ECO:0000313|EMBL:AAU90300.2} OS=Solanum demissum (Wild potato) PE=4 SV=2	homoserine dehydrogenase family protein [Solanum demissum]
CSS0022642.1	--	--	--	--	Uncharacterized protein {ECO:0000313|EMBL:EMJ16824.1} OS=Prunus persica (Peach) PE=4 SV=1	PREDICTED: uncharacterized protein LOC103327874 [Prunus mume]
CSS0022673.1	Cellular Component: cis-Golgi network (GO:0005801);; Cellular Component: cytosol (GO:0005829);; Biological Process: intracellular protein transport (GO:0006886);; Cellular Component: membrane (GO:0016020);;	K20290|8.5299e-25|bna:106389670|K20290 conserved oligomeric Golgi complex subunit 3 | (RefSeq) conserved oligomeric Golgi complex subunit 3-like	Intracellular trafficking, secretion, and vesicular transport	--	BnaA07g30870D protein {ECO:0000313|EMBL:CDX96476.1} OS=Brassica napus (Rape) PE=4 SV=1	PREDICTED: conserved oligomeric Golgi complex subunit 3-like [Camelina sativa]
CSS0022852.1	Cellular Component: Golgi apparatus (GO:0005794);; Cellular Component: cis-Golgi network (GO:0005801);; Cellular Component: cytosol (GO:0005829);; Biological Process: intracellular protein transport (GO:0006886);; Cellular Component: membrane (GO:0016020);;	K20290|0|sind:105161966|K20290 conserved oligomeric Golgi complex subunit 3 | (RefSeq) conserved oligomeric Golgi complex subunit 3	Intracellular trafficking, secretion, and vesicular transport	Sec34-like family	Putative uncharacterized protein {ECO:0000313|EMBL:CBI27744.3} OS=Vitis vinifera (Grape) PE=4 SV=1	PREDICTED: conserved oligomeric Golgi complex subunit 3 [Sesamum indicum]
CSS0024082.1	--	--	--	Double-stranded RNA binding motif	DsRNA-binding protein 3 {ECO:0000313|EMBL:EOY11187.1} OS=Theobroma cacao (Cacao) PE=4 SV=1	DsRNA-binding protein 3 [Theobroma cacao]
CSS0025801.1	--	--	--	Plant mobile domain	Putative uncharacterized protein {ECO:0000313|EMBL:CAN81672.1} OS=Vitis vinifera (Grape) PE=4 SV=1	hypothetical protein VITISV_000588 [Vitis vinifera]
CSS0026597.1	--	K18183|3.41861e-53|spen:107005744|K18183 cytochrome c oxidase assembly protein subunit 19 | (RefSeq) cytochrome c oxidase assembly protein COX19-like	Energy production and conversion	CHCH domain	Uncharacterized protein {ECO:0000313|EnsemblPlants:Solyc12g044380.1.1} OS=Solanum lycopersicum (Tomato) PE=4 SV=1	PREDICTED: cytochrome c oxidase assembly protein COX19-like [Nicotiana tomentosiformis]
CSS0027335.1	Molecular Function: ARF guanyl-nucleotide exchange factor activity (GO:0005086);; Biological Process: regulation of ARF protein signal transduction (GO:0032012);;	K13462|0|vvi:100249070|K13462 guanine nucleotide-exchange factor | (RefSeq) brefeldin A-inhibited guanine nucleotide-exchange protein 5	Intracellular trafficking, secretion, and vesicular transport	Sec7 domain	Putative uncharacterized protein {ECO:0000313|EMBL:CCB51355.1} OS=Vitis vinifera (Grape) PE=4 SV=1	PREDICTED: brefeldin A-inhibited guanine nucleotide-exchange protein 5 [Vitis vinifera]
CSS0027728.1	Molecular Function: saccharopine dehydrogenase (NADP+, L-glutamate-forming) activity (GO:0004755);; Molecular Function: saccharopine dehydrogenase (NADP+, L-lysine-forming) activity (GO:0047130);; Biological Process: oxidation-reduction process (GO:0055114);;	K14157|0|vvi:100268037|K14157 alpha-aminoadipic semialdehyde synthase [EC:1.5.1.8 1.5.1.9] | (RefSeq) alpha-aminoadipic semialdehyde synthase	Amino acid transport and metabolism	Saccharopine dehydrogenase	Putative uncharacterized protein {ECO:0000313|EMBL:CCB51358.1} OS=Vitis vinifera (Grape) PE=4 SV=1	unnamed protein product [Vitis vinifera]
CSS0028973.1	Molecular Function: chitinase activity (GO:0004568);; Biological Process: carbohydrate metabolic process (GO:0005975);; Biological Process: chitin catabolic process (GO:0006032);;	K01183|2.20996e-167|sind:105166378|K01183 chitinase [EC:3.2.1.14] | (RefSeq) acidic mammalian chitinase-like	Carbohydrate transport and metabolism	Glycosyl hydrolases family 18	Putative uncharacterized protein {ECO:0000313|EMBL:CBI25622.3} OS=Vitis vinifera (Grape) PE=3 SV=1	unnamed protein product [Vitis vinifera]
CSS0029431.1	Cellular Component: protein phosphatase type 2A complex (GO:0000159);; Molecular Function: nucleotide binding (GO:0000166);; Cellular Component: cytosol (GO:0005829);; Biological Process: protein dephosphorylation (GO:0006470);; Molecular Function: protein phosphatase regulator activity (GO:0008601);;	K04354|2.4966e-12|sind:105157725|K04354 serine/threonine-protein phosphatase 2A regulatory subunit B | (RefSeq) serine/threonine protein phosphatase 2A 55 kDa regulatory subunit B beta isoform	Signal transduction mechanisms	--	Serine/threonine-protein phosphatase 2A 55 kDa regulatory subunit B {ECO:0000256|RuleBase:RU331113} OS=Arabis alpina (Alpine rock-cress) PE=3 SV=1	PREDICTED: serine/threonine protein phosphatase 2A 55 kDa regulatory subunit B beta isoform isoform X2 [Sesamum indicum]
CSS0031473.1	--	--	General function prediction only	--	Reverse transcriptase like protein {ECO:0000313|EMBL:CAB10337.1} OS=Arabidopsis thaliana (Mouse-ear cress) PE=4 SV=1	PREDICTED: putative ribonuclease H protein At1g65750 [Brassica rapa]
CSS0031837.1	--	--	--	--	Coffea canephora DH200=94 genomic scaffold, scaffold_2 {ECO:0000313|EMBL:CDO98060.1} OS=Coffea canephora (Robusta coffee) PE=4 SV=1	unnamed protein product [Coffea canephora]
CSS0032416.2	Biological Process: cell morphogenesis (GO:0000902);; Biological Process: protein targeting to vacuole (GO:0006623);; Biological Process: tRNA processing (GO:0008033);; Cellular Component: membrane (GO:0016020);; Biological Process: cell growth (GO:0016049);; Molecular Function: hydrolase activity (GO:0016787);; Biological Process: Golgi vesicle transport (GO:0048193);;	--	--	ENTH domain	Putative uncharacterized protein {ECO:0000313|EMBL:CBI36100.3} OS=Vitis vinifera (Grape) PE=4 SV=1	PREDICTED: VHS domain-containing protein At3g16270 [Vitis vinifera]
CSS0032518.1	Cellular Component: integral component of membrane (GO:0016021);;	--	General function prediction only	Proteolipid membrane potential modulator	Coffea canephora DH200=94 genomic scaffold, scaffold_43 {ECO:0000313|EMBL:CDP10252.1} OS=Coffea canephora (Robusta coffee) PE=4 SV=1	PREDICTED: UPF0057 membrane protein At2g24040-like [Sesamum indicum]
CSS0033257.1	Cellular Component: mitochondrion (GO:0005739);;	--	--	Domain of unknown function (DUF4216)	Uncharacterized protein {ECO:0000313|EMBL:ESR34177.1} (Fragment) OS=Citrus clementina PE=4 SV=1	PREDICTED: uncharacterized protein LOC103420839 [Malus domestica]
CSS0033277.1	Biological Process: metabolic process (GO:0008152);; Molecular Function: oxidoreductase activity, acting on the CH-CH group of donors (GO:0016627);;	--	--	--	Uncharacterized protein {ECO:0000313|EMBL:EEE96328.2} OS=Populus trichocarpa (Western balsam poplar) PE=4 SV=2	hypothetical protein POPTR_0012s09440g [Populus trichocarpa]
CSS0036462.1	Biological Process: mitotic cell cycle (GO:0000278);; Molecular Function: damaged DNA binding (GO:0003684);; Molecular Function: ATP binding (GO:0005524);; Cellular Component: nucleus (GO:0005634);; Biological Process: DNA-dependent DNA replication (GO:0006261);; Biological Process: regulation of DNA replication (GO:0006275);; Biological Process: DNA methylation (GO:0006306);; Biological Process:…	K04482|0|vvi:100252629|K04482 DNA repair protein RAD51 | (RefSeq) DNA repair protein RAD51 homolog	Replication, recombination and repair	Rad51	Putative uncharacterized protein {ECO:0000313|EMBL:CBI27743.3} OS=Vitis vinifera (Grape) PE=3 SV=1	PREDICTED: DNA repair protein RAD51 homolog [Vitis vinifera]
CSS0038134.1	Molecular Function: transferase activity, transferring acyl groups other than amino-acyl groups (GO:0016747);;	--	--	Transferase family	Putative uncharacterized protein {ECO:0000313|EMBL:CCB57566.1} OS=Vitis vinifera (Grape) PE=4 SV=1	PREDICTED: shikimate O-hydroxycinnamoyltransferase [Vitis vinifera]
CSS0039220.1	--	K01873|2.06345e-43|vvi:100257207|K01873 valyl-tRNA synthetase [EC:6.1.1.9] | (RefSeq) valine--tRNA ligase, mitochondrial 1	Translation, ribosomal structure and biogenesis	Anticodon-binding domain of tRNA	Putative uncharacterized protein {ECO:0000313|EMBL:CCB56476.1} OS=Vitis vinifera (Grape) PE=3 SV=1	PREDICTED: valine--tRNA ligase isoform X2 [Vitis vinifera]
CSS0039897.1	Molecular Function: nucleic acid binding (GO:0003676);; Molecular Function: ATP-dependent helicase activity (GO:0008026);;	K11136|1.9994e-48|sind:105157616|K11136 regulator of telomere elongation helicase 1 [EC:3.6.4.12] | (RefSeq) regulator of telomere elongation helicase 1	Replication, recombination and repair	Helicase C-terminal domain	Coffea canephora DH200=94 genomic scaffold, scaffold_2 {ECO:0000313|EMBL:CDO98062.1} OS=Coffea canephora (Robusta coffee) PE=4 SV=1	PREDICTED: regulator of telomere elongation helicase 1 [Sesamum indicum]
CSS0041872.1	--	K13462|2.08657e-07|jcu:105638044|K13462 guanine nucleotide-exchange factor | (RefSeq) brefeldin A-inhibited guanine nucleotide-exchange protein 5	--	--	Coffea canephora DH200=94 genomic scaffold, scaffold_12 {ECO:0000313|EMBL:CDP04128.1} OS=Coffea canephora (Robusta coffee) PE=4 SV=1	unnamed protein product [Coffea canephora]
CSS0042371.1	--	--	--	Late embryogenesis abundant protein	Late embryogenesis abundant hydroxyproline-rich glycofamily protein isoform 1 {ECO:0000313|EMBL:EOY26755.1} OS=Theobroma cacao (Cacao) PE=4 SV=1	Late embryogenesis abundant hydroxyproline-rich glycofamily protein isoform 1 [Theobroma cacao]
CSS0043475.1	Cellular Component: cytoplasmic part (GO:0044444);; Biological Process: response to stimulus (GO:0050896);;	K18211|5.59468e-149|sind:105168852|K18211 synaptosomal-associated protein 25 | (RefSeq) SNAP25 homologous protein SNAP33	Intracellular trafficking, secretion, and vesicular transport	SNARE domain	Uncharacterized protein {ECO:0000313|EnsemblPlants:PGSC0003DMT400063113} OS=Solanum tuberosum (Potato) PE=4 SV=1	PREDICTED: SNAP25 homologous protein SNAP33 [Nicotiana sylvestris]
CSS0044516.1	Molecular Function: nucleotide binding (GO:0000166);; Molecular Function: nucleic acid binding (GO:0003676);; Molecular Function: ATP-dependent helicase activity (GO:0008026);;	K11136|1.72506e-129|vvi:100265202|K11136 regulator of telomere elongation helicase 1 [EC:3.6.4.12] | (RefSeq) regulator of telomere elongation helicase 1 homolog	Replication, recombination and repair	Helicase C-terminal domain	Putative uncharacterized protein {ECO:0000313|EMBL:CCB59483.1} OS=Vitis vinifera (Grape) PE=4 SV=1	unnamed protein product [Vitis vinifera]
CSS0045452.1	Biological Process: dephosphorylation (GO:0016311);; Molecular Function: phosphatase activity (GO:0016791);;	--	--	5' nucleotidase, deoxy (Pyrimidine), cytosolic type C protein (NT5C)	Putative uncharacterized protein {ECO:0000313|EMBL:CCB51357.1} OS=Vitis vinifera (Grape) PE=4 SV=1	PREDICTED: uncharacterized protein LOC104609245 [Nelumbo nucifera]
CSS0046454.1	Molecular Function: binding (GO:0005488);;	--	--	Protein of unknown function (DUF 659)	Putative uncharacterized protein {ECO:0000313|EMBL:CAN78025.1} OS=Vitis vinifera (Grape) PE=4 SV=1	PREDICTED: uncharacterized protein LOC104879612 [Vitis vinifera]
CSS0048062.1	Biological Process: transcription, DNA-templated (GO:0006351);;	--	--	B3 DNA binding domain	Uncharacterized protein {ECO:0000313|EMBL:ESR53262.1} OS=Citrus clementina PE=4 SV=1	hypothetical protein CICLE_v10023279mg [Citrus clementina]
CSS0048175.1	Molecular Function: transferase activity, transferring acyl groups (GO:0016746);;	--	--	Transferase family	Putative uncharacterized protein {ECO:0000313|EMBL:CCB57566.1} OS=Vitis vinifera (Grape) PE=4 SV=1	PREDICTED: shikimate O-hydroxycinnamoyltransferase [Vitis vinifera]
CSS0050134.1	Cellular Component: protein phosphatase type 2A complex (GO:0000159);; Biological Process: signal transduction (GO:0007165);; Molecular Function: protein phosphatase regulator activity (GO:0008601);;	K04354|0|cam:101503556|K04354 serine/threonine-protein phosphatase 2A regulatory subunit B | (RefSeq) serine/threonine protein phosphatase 2A 55 kDa regulatory subunit B beta isoform-like	Signal transduction mechanisms	WD domain, G-beta repeat	Serine/threonine-protein phosphatase 2A 55 kDa regulatory subunit B {ECO:0000256|RuleBase:RU331113} OS=Phaseolus vulgaris (Kidney bean) PE=3 SV=1	PREDICTED: serine/threonine protein phosphatase 2A 55 kDa regulatory subunit B beta isoform-like isoform X1 [Cicer arietinum]
CSS0000912.1	unknow
CSS0005838.1	unknow
CSS0016977.1	unknow
CSS0021417.1	unknow
CSS0021928.1	unknow
CSS0029221.1	unknow
CSS0031240.1	unknow
CSS0045801.1	unknow
CSS0048492.1	unknow
CSS0048672.1	unknow
