# Supplementary material for: QTL Mapping for Leaf Area of Tea Plants (Camellia sinensis) Based on a High-Quality Genetic Map Constructed by Whole Genome Resequencing
Source: Front Plant Sci. 2021 Jul 29;12:705285. doi: 10.3389/fpls.2021.705285 (PMC8358608; doi:10.3389/fpls.2021.705285)
Supplement: Supplementary Table 4 — Tea plant samples information used in indel marker development. [file Table_4.XLSX]

## Sheet: Sheet1
Table S4. Tea plant samples information used in indel markers development
Sample code	Sample name	Sample code	Sample name
1	Yunxuan 9	40	Yuexipinxi 901
2	Foxiang 1	41	Shuchazao
3	Changyebaihao	42	Huangjingui
4	Yunkang14	43	Shancha 1
5	Qingshui3	44	Echa 5
6	Shuangjiangheidaye	45	Echa 1
7	Mengkudaye	46	Chunbolv
8	Xiuhong	47	Fuandabai
9	Yinghong 9	48	Zhenghedabai
10	Menghaidaye	49	Longjingchangye
11	Hongyan 12	50	Jinmudan
12	Zijuan	51	Yaoshanxiulv
13	Qianmei 601	52	Zimudan
14	Yunkang 43	53	Guilv 1
15	Yunkang 37	54	Duokangxiang
16	Fenghuangshuixian	55	Shidachahuangzhong
17	LWBJC 7	56	Chunlan
18	MGMS 13	57	Xiaoxianghong 21-3
19	MNPZS 4	58	Wuyedancong
20	MGMS 10	59	Huangshanbaicha 3
21	Nannuoshan 10	60	Jinmeigui
22	Nannuoshan 20	61	Xianyuxiang
23	Heikai 33	62	Yusun
24	Nannuoshan 14	63	Shifocui
25	Heikai 12	64	Jinzhaijinji
26	Nannuoshan 11	65	Dahongpao
27	Yunnanbianyizicha 3	66	Mingshanbaihao 131
28	Yunnanbianyizicha 1	67	Jianhexiangcha
29	Yunnanbianyizicha 2	68	Rougui
30	MNP1-S1	69	Zhongcha 108
31	BD 16
32	BD 14
33	Qianmei 809
34	Foshou
35	Xinyang10
36	Maoxie
37	Benshan
38	Meizhan
39	Guixiang 22
