# Supplementary material for: QTL Mapping for Leaf Area of Tea Plants (Camellia sinensis) Based on a High-Quality Genetic Map Constructed by Whole Genome Resequencing
Source: Front Plant Sci. 2021 Jul 29;12:705285. doi: 10.3389/fpls.2021.705285 (PMC8358608; doi:10.3389/fpls.2021.705285)
Supplement: Supplementary Table 5 — Primer information used for qRT-PCR. [file Table_5.XLS]

## Sheet: Sheet1
Table S5. Primer information used for qRT-PCR
Gene ID	Forward primer	Reverse primer
CSS0018458.1	GCTGTTTTTATTGGGGTTATG	TTTGCTTCTTCTAGATGTGAT
CSS0036462.1	TTATGGCGAGTTTCGATCTG	TCTGTAGGAGTCTCTGTGGT
CSS0002551.1	TCAGCAGAGGGAGAGGAGATA	CACCCGACATTGAAAGAGTAA
CSS0042371.1	TCTCCTCGTCTCTGCTTTCCT	AATACCCCAGTTTCTTTCCCC
CSS0005668.1	CGACCTATCCCTTTTCCCA	GGTTCCACGCAGATTTCAC
CSS0011072.1	TCACAGAGACCTCGCTGACCC	GTGCTTGATCTCCATGACGGT
CSS0043475.1	GGACCTCTTCGTCTTCTTATG	TTCTTGGACACTCTGATTCTC
CSS0004196.1	CCTTGGGCTTCTGCTTGGGTT	CTGTAATAGTCGGGGTTGGGG
CSS0002519.1	TGCTCGCTGTTTGAATGGTGG	CTTCGTTCCCTTTCCGGTGTT
CSS0006562.1	TTCAAGAGGTCGATGATGGA	GCTTTGGAAACTCGTAGGTG
CSS0046454.1	GGGAGGGCAAAACAACAAACT	CACACCATACTCACCAACCGA
CSS0007000.1	GGTTTTTTCAAATCCCGCATC	GCCACTCATCATCGTCACTGT
CSS0002644.1	TTTGGGGACAGGAATGGATA	CCTTGGCTCAGGAATAGGAA
CSS0050134.1	CTATTCCGAGTGTTTGGTCGT	TTGAGTTTTCAGTTGGATGCC
CSS0018166.1	GAAGGCAAGCAGAAGAACAAG	GGCTATAAAGTCATCAGGACC
CSS0032416.2	TACGTGAGGTGGTTGGTATT	TGGTTGTTTCTGTCTGGTTA
