# Supplementary material for: QTL Mapping for Leaf Area of Tea Plants (Camellia sinensis) Based on a High-Quality Genetic Map Constructed by Whole Genome Resequencing
Source: Frontiers journal article supplement (doi:10.3389/fpls.2021.705285), 2021-07-29
Supplement: Table_1.XLS [file Table_1.XLS]

## Sheet: table S1
Table S1. Summary of the sequencing data of the F1 generation and their parents
BMK ID	Ave_depth	Cov_ratio_1X(%)	Cov_ratio_10X(%)	Total_reads	Mapped(%)	Properly_mapped(%)
R29	4	80.74	13.15	111183242	97.12	83.32
R124	5	81.61	13.86	111695888	97.19	84.31
R135	4	80.44	12.45	112159618	96.33	82.84
R28	5	84.14	19.69	140069198	97.15	83.09
R35	5	83.32	17.47	132052972	97.3	82.91
R18	5	81.88	15.9	126483336	96.6	83.17
R32	5	82.86	16.97	130119510	97.26	83.53
R133	4	82.56	13.2	116403100	94.61	82.21
R37	5	81.48	15.67	125033376	96.18	83.19
R34	5	82.36	16.51	128483998	97.15	83.6
R01	5	82.95	17.26	130750270	97.39	83.64
R25	5	83.49	17.8	132024312	96.62	83.04
R142	5	81.63	14.85	120988840	97.05	83.85
R02	5	84.02	19.3	137837486	97.24	83.06
R22	5	83.78	18.74	135335452	97.36	84.07
R51	4	80.97	11.58	108143084	95.84	83.1
R73	4	82.47	12.74	114478594	95.32	82.62
R03	5	81.86	16.36	128359826	95.51	82.64
R13	5	83.04	18.2	133605830	97.03	83.42
R113	4	80.67	11.83	105109732	96.99	84.64
R33	5	83.19	18.4	134628686	97.5	83.94
R24	5	82.69	17.22	128674188	96.59	84.21
R127	4	81.89	13.2	115852118	95.27	82.91
R67	4	81.95	12.75	117329664	94.08	81.32
R09	5	82.72	17.97	132446276	97.39	84.27
R44	4	81.31	11.6	111317256	95.63	81.23
R138	5	83.18	18.17	139993810	96.25	82.18
R125	4	81.46	12.9	110573654	96.74	84.16
R04	5	84.14	20.03	142226234	97.26	83.8
R11	5	82.22	17.3	128480810	97.08	84.4
R143	5	82.51	17.24	132243218	97.09	83.82
R77	5	82.6	13.74	119558990	96.58	83.73
R136	5	84.23	20.07	143082408	97.05	83.49
R39	5	83.48	19.64	140622080	96.47	83.57
R17	5	81.09	16.27	128766116	93.67	81.29
R79	5	82.93	14.39	116997430	97.35	84.52
R21	5	82.46	17.55	129435260	97.46	85
R23	5	82.92	18.48	134761030	96.95	84.28
R96	5	83.83	14.32	118294784	97.23	84.13
R38	5	83.06	17.93	134182562	97.02	83.57
R68	5	82.35	13.75	117845618	96.79	83.78
R08	5	82.99	18.76	137235066	96.76	83.83
R49	4	80.83	12.04	114703934	92.74	81.05
R16	5	83.13	18.47	134251572	97.23	84.42
R27	6	84.31	21.2	144574074	97.06	83.9
R58	5	83.91	16.16	129656478	96.87	83.02
R129	5	81.53	13.84	111613076	97.66	86.01
R115	4	79.06	10.43	99357066	96.31	85.28
R130	5	81.95	14.1	116758892	96.64	85.19
R84	5	84.3	15	123045590	97.17	83.9
R53	5	83.77	15.4	126156842	96.55	83.4
R75	5	83.37	15.22	125664444	96.49	83.72
R55	4	81.49	13.02	114396640	96.63	84.36
R121	5	83.06	15.37	119176460	97.7	85.63
R65	5	83.37	15.27	124622090	95.07	82.98
R101	5	82.89	13.92	113754578	97.48	85.13
R19	5	83.77	19.9	142963474	95.93	83.14
R61	5	82.52	14.24	123238804	92.47	80.98
R54	5	83.76	16.62	130157028	96.75	83.98
R69	5	83.59	15.96	125704418	97.16	83.87
R131	5	83.5	16.05	123379144	97.53	85.55
R71	5	83.1	15.09	126353396	96.66	83.24
R97	5	83.55	15.14	125558190	96.5	83.82
R137	5	81.02	15.3	123261016	96.67	84.48
R134	6	84.72	22.7	150265384	97.67	84.6
R05	5	83.34	19.35	137971966	97.33	84.8
R132	5	82.62	15.38	118662722	97.73	85.77
R128	5	83	15.83	123529412	97.46	85.29
R105	5	82.67	14.16	117436200	96.02	83.69
R56	5	82.19	13.79	121120688	95.99	83.57
R126	5	82.99	16.6	124003762	97.47	86
R42	5	82.24	14.42	129188568	91.7	80.04
R20	5	82.2	18.4	134562198	96.12	84.3
R76	6	85.66	19.9	146349842	96.24	82.52
R83	5	84.49	16.48	123868084	96.98	83.26
R102	5	83.38	14.79	120259880	96.72	84.27
R141	6	85.93	24.87	161330766	97.09	83.21
R50	5	83.87	17.4	134442220	95.97	83.29
R92	5	83.93	16.65	125847822	97.7	85.99
R108	5	84.1	15.74	125037756	97.3	85.07
R98	5	84.46	17.27	130435788	97.48	85.25
R110	5	83.87	16.13	125303018	97.4	85.29
R81	5	81.67	13.26	110203350	97.71	85.98
R120	5	84.57	19.67	136536664	97.67	85.92
R10	6	84.21	23.08	153624822	97.05	84.97
R140	6	84.8	22.4	150286794	97.71	85
R89	5	84.83	19.03	135519854	97.81	86.08
R45	5	84.29	19.17	144065952	96.61	84.25
R107	6	85.37	19.89	141032810	96.45	84.72
R40	5	82.44	15.84	126824762	96.57	84.59
R106	5	83.65	17.35	132118852	97.54	85.73
R104	4	81.24	13.58	113895434	96.51	85.73
R99	5	83.63	16.69	127396986	97.41	86.31
R48	6	85.39	21.97	152783100	96.76	84.71
R43	6	84.83	20.69	152180500	96.26	84.12
R109	6	85.83	23.42	154601252	97.79	86.88
Jinxuan	17	89.93	64.53	457889412	96.72	82.74
Yuncha 1	17	92.04	69.36	435124928	97.14	85.29
